# Supplementary material for: Full characterization and calibration of a transfer standard monitor for atmospheric radon and thoron measurements
Source: Copernicus journal article supplement (doi:10.5194/egusphere-2023-2680), 2023-11-21
Supplement: Supplementary file [file egusphere-2023-2680-RC2-supplement.pdf]

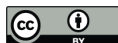

## Full characterization and calibration of a transfer standard monitor for atmospheric radon and thoron measurements

Roger Curcoll<sup>1</sup>, Claudia Grossi<sup>1,2</sup>, Stefan Röttger<sup>3</sup>, Arturo Vargas<sup>1</sup>

<sup>1</sup>Institut de Tècniques Energètiques (INTE), Universitat Politècnica de Catalunya, Barcelona, Spain

<sup>2</sup>Department of Physics, Universitat Politècnica de Catalunya, Barcelona, Spain

<sup>3</sup>Physikalisch-Technische Bundesanstalt, 38116 Braunschweig, Germany

Correspondence to: Roger Curcoll (roger.curcoll@upc.edu)

### Abstract.

10 In this work a full characterization of the new user-friendly version of the Atmospheric Radon MONitor (ARMON), used to measure very low activity concentrations of the radioactive radon gas in the outdoor atmosphere, is carried out. The ARMON is based on the electrostatic collection of  $^{218}\text{Po}^+$  particles on a semiconductor detector surface. A main advantage of this instrument is offering high resolution alpha energy spectra which will allow to separate radon progeny ( $^{210}\text{Po}$ ,  $^{218}\text{Po}$  and  $^{214}\text{Po}$ ). The monitor feature may also allow measurements of thoron ( $^{220}\text{Rn}$ ) by collection of  $^{216}\text{Po}^+$ .

15

In this work the physical principle, the hardware configuration and the software development of the automatic and remotely controlled ARMON, conceived and constructed within the MAR<sup>2</sup>EA and the traceRadon projects, are described. The monitor efficiency and its linearity over a wide spam of radon concentration activities has been here evaluated and tested using theoretical as well as experimental approaches. Finally, a complete budget analysis of the total uncertainty of the monitor was also achieved.

20

Results from the application of a simplified theoretical approach shows a detection efficiency for  $^{218}\text{Po}^+$  of about  $0.0075 (\text{Bq m}^{-3})^{-1} \text{ s}^{-1}$ . The experimental approach, consisting of exposing the ARMON at controlled radon concentrations between few hundreds to few thousands of  $\text{Bq m}^{-3}$ , gives a detection efficiency for  $^{218}\text{Po}^+$  of  $0.0057 \pm 0.0002 (\text{Bq m}^{-3}) \text{ s}^{-1}$ . This last value and its independence from the radon levels was also confirmed thanks to a new calibration method which allows, using low emanation sources, to obtain controlled radon levels of few tens of  $\text{Bq m}^{-3}$ .

25

The total uncertainty of the ARMON detection efficiency obtained for hourly radon concentration above  $5 \text{ Bq m}^{-3}$  was lower than 10 % ( $k=1$ ). The characteristics limits of the ARMON were also calculated, being those dependent on the presence of thoron in the sampled air, and a value of  $0.132 \text{ Bq m}^{-3}$  was estimated in thoron absence. Current results may allow to confirm that the ARMON is suitable to measure low-level radon activity concentration ( $1 \text{ Bq m}^{-3} - 100 \text{ Bq m}^{-3}$ ) and to be used as transfer standard to calibrate secondary atmospheric radon monitors.

30

### 1 Introduction

$^{222}\text{Rn}$  is a radioactive noble gas naturally generated from Radium ( $^{226}\text{Ra}$ ) within the primordial Uranium-238 ( $^{238}\text{U}$ ) decay chain (Nazaroff and Nero, 1988). Its exhalation from soils depends mainly on the uranium content, soil properties as porosity or bulk density, and soil moisture (Conen and Robertson, 2002). The global  $^{222}\text{Rn}$  source into the atmosphere is mainly restricted to land surfaces (Szegvary et al., 2009; Karstens et al., 2015), with the  $^{222}\text{Rn}$  flux from water surfaces considered negligible for most applications (Schery and Huang, 2004). Radon has a half-life of 3.82 days and, due to the fact that does not have any other significant atmospheric sink rather than its radioactive decay, has been largely used in the last decades as a

35



40 tracer for atmospheric studies.  $^{222}\text{Rn}$  has been used to understand atmospheric processes such as the dynamics of the boundary  
layer (Chambers et al., 2011; Pal et al., 2015; Vargas et al., 2015), to improve inverse transport models (Hirao et al., 2010), to  
assess the accuracy of chemical transport models (Jacob and Prather, 1990; Arnold et al., 2010; Chambers et al., 2019), or to  
study atmospheric transport and mixing processes within the planetary boundary layer (Zahorowski et al., 2004; Galmarini,  
2006; Baskaran, 2011, 2016; Williams et al., 2016). When measured together with another gas (e.g. air pollutants or greenhouse  
45 gases such as carbon dioxide or methane), it can be also used to detect sources and to indirectly quantify fluxes of that gas.  
The Radon Tracer Method (RTM) (Levin et al., 1999) is one of the methodologies used to indirectly determine regional and  
nocturnal fluxes of greenhouse gases and air pollutants (Vogel et al., 2012; Wada et al., 2013; Levin et al., 2021). In addition,  
if RTM is used together with back trajectories analyses, it will allow a better quantification of the different local versus regional  
contributions and an estimation of the effective radon flux seen by the station under study (Grossi et al., 2018).

50 For its utility,  $^{222}\text{Rn}$  measurements are so far not mandatory but recommended at the atmospheric stations of the Integrated  
Carbon Observation System network (ICOS RI, 2020). Atmospheric radon activity concentrations are usually ranging between  
few hundreds of  $\text{mBq m}^{-3}$  and tens of  $\text{Bq m}^{-3}$ , depending if the measurements are carried on at coastal or continental sites,  
respectively (Chambers et al., 2016; Grossi et al., 2016). Thus, high precision radon measurements are required for atmospheric  
applications.

55 Available commercial radon monitors, usually used in the radiation protection field or for geophysics research goals, are so  
far not suitable for high quality atmospheric measurements too (Radulescu et al., 2022). In the last years three research entities  
have designed and developed high sensitive  $^{222}\text{Rn}$  or  $^{222}\text{Rn}$  progeny monitors which are currently running at different European  
atmospheric stations: i) the Heidelberg monitor, developed at the Institute of Environmental Physics of the Heidelberg  
University (Schmidt et al., 1996; Levin et al., 2002), determines the atmospheric  $^{222}\text{Rn}$  activity concentration using the  
60 measured  $^{214}\text{Po}$  daughter activity with a static filter method and assuming a constant equilibrium factor between radon and its  
short lived progeny in air. (Schmithüsen et al., 2017); ii) the monitor from the Australian Nuclear Science and Technology  
Organisation (ANSTO), which determines the atmospheric  $^{222}\text{Rn}$  activity concentration using dual-flow-loop two-filter method  
(Whittlestone and Zahorowski, 1998; Zahorowski et al., 2004); iii) the Atmospheric Radon MONitor (ARMON), designed  
and built at the Institute of Energy Technologies (INTE) of the Universitat Politècnica de Catalunya (UPC), which is based on  
65 alpha spectrometry from the positive ions of  $^{218}\text{Po}$  electrostatically collected on a Passivated Implanted Planar Silicon (PIPS)  
detector surface (Grossi et al., 2012; Vargas et al., 2004, 2015). Several monitors of this last type have been displaced at  
atmospheric Spanish stations for atmospheric research studies (Grossi, 2012; Hernández-Ceballos et al., 2015; Vargas et al.,  
2015; Grossi et al., 2018; Gutiérrez-Álvarez et al., 2019). The response of the ARMON under different field conditions was  
also compared with the ones from other previously cited research instruments in the south of Paris in 2016 (Grossi et al., 2020).

70 In the framework of the Catalan MAR<sup>2</sup>EA project (High Efficiency monitor of atmospheric radon concentration for  
radioprotection and environmental applications, Llabor program, 2020-2021) and of the Working Package 1 (WP1) of the  
European traceRadon project (Röttger et al., 2021), an improved ARMON prototype was developed (here labelled as ARMON  
v2). The main objective of the traceRadon project was the development of a metrological infrastructure to ensure traceable of  
low levels radon measurements. Specifically, the WP1 aimed to develop traceable methods, according to IEC 61577, for the  
75 measurement of outdoor low-level radon activity concentrations in the range of  $1 \text{ Bq m}^{-3}$  to  $100 \text{ Bq m}^{-3}$ , with uncertainties  
lower than 10 % ( $k=1$ ), to be used in climate and radiation protection networks. Within this WP1, the INTE-UPC group was  
in charge to design and build a mobile and user-friendly transfer standard instrument useful to calibrate radon monitors running  
at atmospheric and radiological stations. This new user-friendly monitor is an improved version of the previous ARMON,  
mainly in regard to its robustness, portability, sensitivity, setting and automatic control.

80



In the present manuscript the design and setup of the ARMON v2 are described in detail together with the theoretical and experimental methodologies applied to evaluate the detection efficiency of the monitor. The total uncertainty of the ARMON detection efficiency was also calculated considering the different parameters and variables that could influence it such as the statistic number of counts of each alpha spectrum measured by the ARMON v2, the effect of the water content of the sampled  
85 air, the STP (Standard Temperature and Pressure) correction, the monitor background, etc.

The ARMON was calibrated at the INTE-UPC radon chamber using reference radon concentrations between few hundred Bq m<sup>-3</sup> and few thousand Bq m<sup>-3</sup>. In order to check if the detection efficiency obtained thanks to the INTE-UPC exposures was also confirmed for very low radon activities concentrations (tens of Bq m<sup>-3</sup>), an independent experiment was carried out at the  
90 Physikalisch-Technische Bundesanstalt (PTB) facility, using new low radon emanation sources and methods also made generated within the WP1 of the traceRadon project.

The ARMON v2 presented in this paper, thanks to its sensitivity and robustness, has the potential to help in the improvement of the sources, transport, and fate of <sup>222</sup>Rn in the environment. The full characterization of this instrument and its uncertainty budget may be useful to support the development of accurate atmospheric studies and to enhance the capabilities of the Radon  
95 Tracer Method for estimating GHG fluxes.

## 2 ARMON description

### 2.1 Physical principles of the ARMON v2

The physical principle of operation of the ARMON is based on the collection of the positive <sup>218</sup>Po charged particles, due to the alpha decay of the <sup>222</sup>Rn within the detection volume, on the surface of a semiconductor detector. This methodology is well  
110 known and has been used in the past by other researchers (Hopke, 1989; Tositti et al., 2002; Grossi et al., 2012). <sup>218</sup>Po<sup>+</sup> particles, generated within a known volume, are found to be in the form of singly charged positive ions the 88 % of the time, while the neutral ions occur the remaining 12 % of the time (Goldstein and Hopke, 1985). <sup>218</sup>Po<sup>+</sup> can be due to the stripping of orbital electrons by the departing  $\alpha$  particle or by the recoil motion. When a high electric potential is applied to the internal surface of the detection volume and the detector itself is maintained at 0 V, an Electrostatic Field (EF) is generated inside the volume,  
115 make charged <sup>218</sup>Po<sup>+</sup> particles to be collected at the detector surface within short time.

In the case of the ARMON, a Passivated Implanted Planar Silicon (PIPS) detector is used. A preamplifier and an amplifier are then used to amplify and shape the electric signal coming from the detector to a Gaussian function in order to be read by a multichannel analyser (MCA), that transforms it into counts for specific energy bins. The spectra generated are then analysed with the software MAESTRO (Multichannel Analyzer Emulation Software, ORTEC). A typical one-hour spectrum from  
120 atmospheric radon in air obtained with the ARMON v2 is shown in the Appendix A (Fig. A1).

Using this previous methodology, the <sup>218</sup>Po counts (with an  $\alpha$  decay at 6.0 MeV) can be separated in the spectrum from other <sup>222</sup>Rn progeny isotopes such as the <sup>214</sup>Po ( $\alpha$  decay at 7.7 MeV) and the <sup>210</sup>Po ( $\alpha$  decay at 5.3 MeV). Using the same principle, the ARMON v2 is also able to measure <sup>220</sup>Rn by detection of its progeny <sup>216</sup>Po ( $\alpha$  decay at 6.8 MeV) and <sup>212</sup>Po (8.78 MeV). However, in the present manuscript the full characterization of the instrument was only carried out for radon measurements  
115 due to the lack of metrology chain for low-level thoron measurements. In this regard, it is needed to be clarified that if <sup>220</sup>Rn (thoron) is also present within the sampled air, <sup>212</sup>Bi particles, due to its decay chain, are also formed through  $\beta$ -decay of <sup>212</sup>Pb. The 36 % of this <sup>212</sup>Bi  $\alpha$ -decays to <sup>208</sup>Tl at a similar energy than <sup>218</sup>Po (6.05 MeV) and affects the net counts of <sup>218</sup>Po and thus the uncertainty of the final radon measurements, as explained in Grossi et al., 2012 and Vargas et al., 2015. The other 64 % of the <sup>212</sup>Bi particles  $\beta$ -decay to <sup>212</sup>Po ( $t_{1/2} = 3.0 \cdot 10^{-7}$ s), which  $\alpha$ -decays at 8.78 MeV to the stable nuclide <sup>208</sup>Pb. Thanks to the  
120 high energy resolution of the ARMON spectra, the decay of the <sup>212</sup>Po particles can be registered, separated and counted. Therefore, the <sup>212</sup>Bi counts can be estimated by multiplying the factor 36/64 to the <sup>212</sup>Po counts, and its contribution may be



subtracted from the gross  $^{218}\text{Po}$  counting. The radon concentration is thus calculated for each spectrum of real time length  $t$  (in seconds), from the Eq. (1):

$$C_{Rn} = \left[ \frac{n_{C_{Po218}}}{t} - \left( \frac{n_{C_{Po212}}}{t} \frac{36}{64} \right) \right] \frac{1}{\varepsilon} \quad (1)$$

125 Where  $n_{C_{Po218}}$  is the number of counts detected within the ROI (region of interest) of  $^{218}\text{Po}$ ,  $n_{C_{Po212}}$  is the number of counts detected within the ROI of  $^{212}\text{Po}$ ,  $t$  is the integration time of the spectrum,  $\varepsilon$  is the detection efficiency of the instrument, defined as detected  $^{218}\text{Po}$  count rate per  $^{222}\text{Rn}$  air concentration, and here expressed in counts per seconds (cps,  $\text{s}^{-1}$ ) per  $\text{Bq m}^{-3}$ . It is also important to underline that charged  $^{218}\text{Po}$  ions present within the detection volume may be neutralized due to the interaction with water vapour present in the sampled air via the formation of hydroxyl radicals OH (Hopke, 1989). Therefore, 130 water vapour particles must be kept as low as possible inside the detection volume in order to maximize the collection efficiency and the response of the monitor, under different water vapour content conditions, must be corrected as shown here. Assuming a linear correction of the efficiency due to water vapour concentration (Hopke, 1989), the real efficiency of our monitor can be expressed by Eq. (2), where  $\varepsilon_0$  is the efficiency in dry condition (0 ppmv of  $\text{H}_2\text{O}$ ),  $b$  is the trend of the linear correction and  $[\text{H}_2\text{O}]$  is the water vapour concentration.

135  $\varepsilon = \varepsilon_0 - b[\text{H}_2\text{O}] \quad (2)$

## 2.2 ARMON set up: Hardware and Software

A schematic design of the ARMON v2 is shown in Fig. 1a. A photography of the external case is shown in Fig. 1b. Before entering the detection volume, the air, sampled with a pump, (blue line in Fig. 1a) passes through a  $0.5 \mu\text{m}$  filter to prevent the entry of dust and aerosol attached  $^{222}\text{Rn}$  progeny into the detection volume. Then the air enters into the detection volume which 140 is made by a glass sphere inside silver-plated with a neck of 45 mm of inner diameter. The PIPS detector of  $300 \text{ mm}^2$  active area (Mirion Technologies A300-17) is located on the upper part of the sphere, tangent to it and at the bottom of the neck. This last configuration was used to maximize the collection of the polonium by the EF as shown later and it was obtained using a solid Teflon stopper. A high voltage power supply (Glassman MJ15P1000) provides a potential of 10 kV between the PIPS detector (at 0 V) and the sphere walls to create the EF. The pulse pre-amplifier and amplifier (model: CR-10 from Pyramid 145 Technical Consultants Inc.) is located outside the sphere to shape and to amplify the signal and to send it to the MCA (model: ORTEC EASY-MCA 2k). When the sampled air exits the detection volume, it passes through a series of sensors: a digital flow meter (SMC PFM710S-F019), a temperature meter (JUMO PT100) and a dew point meter (VAISALA DMT 143). The sensors are controlled by a datalogger (Advantech USB-4622-CE) connected to a laptop. All the hardware is installed inside a flight-case box of  $128 \times 50 \times 50 \text{ cm}^3$ , with the inlet and outlet air sampling connectors located on the backside of the case (Fig 150 1b). The different components of the instrument are placed on different trays and drawers in order to easily access to them and make the necessary maintenance if needed. A drawing and photos of the monitor are shown in the Appendix A (Fig. A2). The inlet flow required for the monitor is of about  $2 \text{ L min}^{-1}$  of dried air.

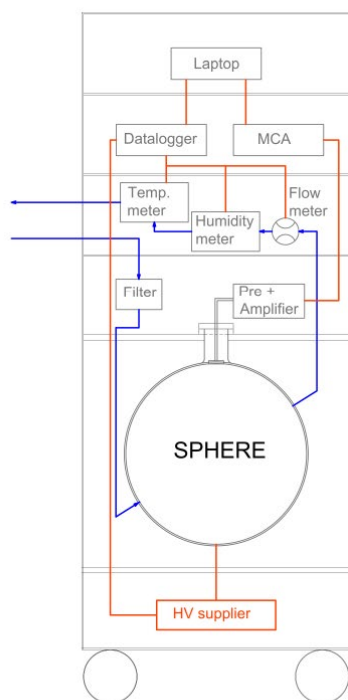

a)

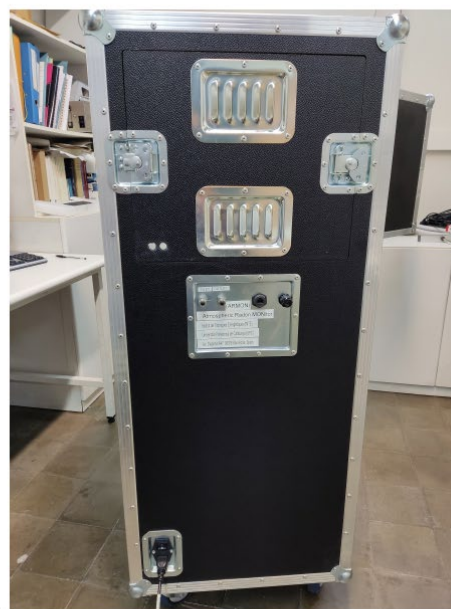

b)

**Figure 1. a): schematic design of the ARMON v2 with its main hardware's and their location. b): Image of the backside of the instrument.**

A specific software named ARMON\_LAB, built on LabVIEW® (Laboratory Virtual Instrument Engineering Workbench), was developed in order to monitor and to control all the parameters and variables of the instrument with the help of the Advantech® datalogger. The software is installed in the ARMON v2 laptop to give the user a full control of the monitor. The software allows the visualization in real time of the different sensors' outputs (flow, humidity and temperature) and allows the control of the high voltage applied to the detection volume. Ten minutes' averages of the different variables are automatically saved in daily files. In parallel, the spectra obtained by the MCA are automatically and regularly saved using the Maestro software script (ORTEC, 2012). After each measurement (usually working on hourly base for atmospheric stations requirements but it can be easily modified) the ARMON\_LAB software calls an R script which uses the information from the Maestro and the output from the environmental sensors to calculate the radon concentration. Real-time as well as past radon concentrations data can be visualized within the ARMON\_LAB interface. Two screenshots of the software are shown in the Appendix A (Fig. A3). The laptop can be connected to internet whether by Wi-Fi or by an ethernet wire and, once installed, the instrument can be fully remotely controlled. A flow chart of the data of the ARMON v2 monitor is shown in the Appendix A (Fig. A4).



## 2.3 ARMON v2 detection efficiency

### 2.3.1 Theoretical approach

175 In order to calculate the radon concentration measured by the ARMON v2 with Eq. (1), the total efficiency ( $\varepsilon$ ) of the instrument  
needs to be known with the possible lowest uncertainty. First of all, the order of magnitude of this efficiency was evaluated  
using a simplified theoretical approach. The theoretical detection efficiency of the ARMON v2,  $\varepsilon_t$ , can mainly be factored  
into two terms: the geometric contribution ( $\varepsilon_g$ ) due to the geometry of the detector surface and corona and the collection efficiency  
( $\varepsilon_c$ ) that depends on the efficiency of the collection of the  $^{218}\text{Po}^+$  on the detector active surface. The two contributions are  
180 expressed in Eq. 3:

$$\varepsilon_t = \varepsilon_g \cdot \varepsilon_c \quad (3)$$

The analysis of these two factors allowed to optimize them during the building of the monitor. As commented in section 2.1,  
the maximum possible percentage of positive charged  $^{218}\text{Po}$  ions collected over the detector surface is of 88 % (Hopke, 1989)  
( $p_{218\text{Po}^+}$ ). However, both the active surface of the PIPS detector and the not active surface (the corona) are at the same potential  
185 (0 V), so when the ions reach the detector they will be distributed over the entire surface, both on the active part and on the  
non-active one. Luckily, this distribution is not spatially homogenous and it will depend on the symmetry and geometry of the  
generated EF as it will be shown here. Furthermore, of those particles collected at the active surface ( $p_{Active}$ ), only about the  
50 % will be emitting alpha particles on the plane including the detector and therefore counted ( $p_{Detected}$ ) number of ions  
per second that are formed in the sphere for a radon concentration in air of  $1 \text{ Bq m}^{-3}$  are calculated by multiplying the formed  
190 ions  $p_{218\text{Po}^+}$  by the sampled air volume  $V$  ( $0.02 \text{ m}^3$ ) and then multiplied by the percent of ions arriving on the detector surface  
and emitting in the detector plane. The resulting  $\varepsilon_g$  in  $\text{s}^{-1}$  per  $\text{Bq m}^{-3}$  is calculated according Eq. (4).

$$\varepsilon_g = V p_{218\text{Po}^+} \cdot p_{Active} \cdot p_{Detected} \quad (4)$$

In order to understand and thus to maximize the collection of the polonium ions on the detector surface, the software COMSOL  
Multiphysics was used to simulate the shape of the EF generated within the ARMON v2 detection volume when different kV  
195 of electric potential ( $V$ ) were applied to the sphere wall. The COMSOL is based on the solving of equations through finite  
element analysis. The output of the COMSOL simulation, with the value of the simulated electrostatic field at each spatial grid  
of the ARMON v2 detection volume, was then used to calculate the drift velocity, the collection trajectories and the travelling  
time of 10.000 polonium fictitious particles, which were initially randomly spaced within the volume. The instantaneous drift  
velocity for each particle  $i$  inside the detection volume depends on the mobility ( $\mu$ ) of the  $^{218}\text{Po}^+$  particles and the EF at its  
200 position as reported in Eq. 5:

$$v_i = \mu \vec{E}_i \quad (5)$$

The mobility of the  $^{218}\text{Po}^+$  ions in air is known to be between  $1 \text{ cm}^2 (\text{V s})^{-1}$  and  $6 \text{ cm}^2 (\text{V s})^{-1}$  (Nazaroff and Nero, 1988;  
Pugliese et al., 2000). A mobility of  $3 \text{ cm}^2 (\text{V s})^{-1}$  was recently reported by Seymour (2017) for a similar study and was also  
used in the present study. Trajectories were calculated using time steps of  $10 \mu\text{s}$ . The arriving position of the simulated particles  
205 on the detector surface were used to estimate the percentage of polonium particles collected on the active area ( $2.99 \text{ cm}^2$ ) and  
on the not active area ( $3.44 \text{ cm}^2$ ) of the detector.

The percentage of polonium ions arriving on the detector surface was calculated taking into account if during the travelling  
time they will suffer radioactive decay ( $T_{1/2} = 184.3 \text{ s}$ ) or if they will be neutralized due to their recombination with  $\text{OH}^-$   
particles or small positive air ions (Dankelmann et al., 2001). As regards, Hopke (1989) found that this recombination  
210 depends on the water volume concentration and that the interval time  $\tau_{\text{H}_2\text{O}}$ , for  $^{218}\text{Po}$  recombination in an electrostatic chamber

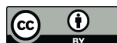

had a value of 0.879 [H<sub>2</sub>O]. From the calculated travelling time, equal to the ratio between the trajectory of each particle to reach the detector and its drift velocity, the effect of the recombination with water particles was calculated as Eq. (6):

$$N = N_o e^{-\log(2) t / (0.879 [\text{H}_2\text{O}]^{-1/2})} \quad (6)$$

where  $N$  are the particles that has not been recombined within the travelling time  $t$ ,  $N_o$  is the initial number of particles and 0.879 [H<sub>2</sub>O]<sup>-1/2</sup> is the interval time of recombination with H<sub>2</sub>O for <sup>218</sup>Po<sup>+</sup> particles. Finally, the theoretical collection efficiency  $\varepsilon_c$  will be calculated as  $N/N_o$ .

The theoretical efficiency  $\varepsilon_t$  obtained from Eq. 3 is has been calculated under conditions hypothesis. However, the real geometry of the generated EF could not be so regular due to: i) the difficulty of positioning the PIPS surface tangent to the sphere; ii) inhomogeneity present in the layer of the cover conductive material of the internal wall of the sphere; iii) uncertainty in the determination of the potential  $V$  applied to the sphere, and iv) the spherical shape and exact measure of the detection volume. Thus, the real efficiency of the monitor could be lower than  $\varepsilon_t$  and it needs also to be evaluated experimentally.

### 2.3.2 Experimental approach

The experimental detection efficiency of the ARMON v2 was obtained by comparing the detected net counts of <sup>218</sup>Po measured with the instrument with a reference radon activity concentration  $C_{Ref}$  measured with a secondary standard reference instrument as it will be explained in the following lines.

The ARMON v2 was calibrated at the INTE-UPC STAR (System for Test Atmospheres with Radon) (Vargas et al., 2004) in October 2021. The INTE-UPC STAR is a chamber with a volume of 20 m<sup>3</sup> which allows to set-up and to continuously measure the radon activity concentration (range 200 Bq m<sup>-3</sup> to 30 kBq m<sup>-3</sup>), the temperature (range 10 °C - 40 °C) and the relative humidity (range 15 %-95 %) (Vargas et al., 2004). The radon source inside the chamber consists of an enclosed Pylon Electronics containing 2100 kBq of <sup>226</sup>Ra. Stable radon concentration inside the chamber are reached by controlling the air flow through the enclosed source and the ventilation rate of the chamber. The second standard reference instrument of this facility is an Atmos monitor (Radonova), serial number 220030. The traceability of the measured magnitude in Bq m<sup>-3</sup> is referred to the Swedish Radiation Safety Authority (Calibration certificate n. SSM2021-2989-4) with an expanded uncertainty ( $k=2$ ) of 6.7 % for 1500 Bq m<sup>-3</sup>.

During the experiments, the ARMON v2 detection efficiency was estimated in a range of radon concentrations between 0.5 kBq m<sup>-3</sup> and 6.2 kBq m<sup>-3</sup>. The ARMON v2 and the reference monitor were installed outside the STAR in parallel configuration. For each instrument, air coming from the radon chamber was passing through monitor and then returned to the chamber. A silica gel dryer was installed before the air was entering at the ARMON v2 in order to reduce the water concentration of the sampled air. The integration time of the ARMON v2 spectra was chosen to be 1 h, and hourly means from the ATMOS were selected from the 10 min. default integration time. Calibration experiments lasted three weeks. The average H<sub>2</sub>O concentration inside the ARMON's detection volume during the efficiency experiments was of about 300 ppmv. The influence of the water vapour concentration on the efficiency was also evaluated at different radon concentrations within the range (635 – 5900) Bq m<sup>-3</sup> and within the range (100 – 3000) ppmv H<sub>2</sub>O, by using different levels of saturated silica gel as dryer.

### 2.4 Uncertainty analysis and characteristic limits of the ARMON v2

The radon activity concentration with the ARMON v2 is calculated, for each acquired spectrum, from the Eq. (1) and its unit is Bq m<sup>-3</sup>. In order to have comparable results with radon values from other stations or monitors, the concentration can be multiplied by a Standard Temperature and Pressure (STP) factor to standardize the concentration obtained to a referenced value of Temperature and Pressure of air. The STP factor can be calculated by Eq. (7):



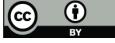

$$STP = C_T C_P = \frac{P_{ref}}{P} \frac{T}{T_{ref}} \quad (7)$$

Where  $C_T$  and  $C_P$  are the corrections for Temperature and Pressure respectively, with  $T$  and  $T_{ref}$  are the sampling temperature and the reference temperature respectively (in K),  $P$  and  $P_{ref}$  are the sampling pressure and the reference pressure respectively.

255 Therefore, Eq. (1) can be expanded, taking into account both the corrected value of the monitor detection efficiency under different humidity conditions as expressed in Eq. (2) and the STP correction from Eq. 6 in the following Eq. (8):

$$C_{Rn} = \left[ \frac{nc_{Po218}}{t} - \left( \frac{nc_{Po212}}{t} \frac{36}{64} \right) \right] \frac{1}{\epsilon_0 - b [H_2O]} \frac{P_{ref}}{P} \frac{T}{T_{ref}} \quad (8)$$

The uncertainty for the radon concentration measurement will be calculated, in agreement with according Guide to the expression of uncertainty in the measurement (BIPM et al., 2008) as in Eq. (9):

$$260 \quad u_{C_{Rn}}^2 = \sum_{i=1}^n \left( \frac{\partial C_{Rn}}{\partial x_i} \right)^2 u_{x_i}^2 \quad (9)$$

where  $x_i$  are the different variables from Eq. 8 taken into consideration for the propagation of the uncertainty.

Resolving the partial differential equation and using Eq. (8), the resulting equation is given in Eq. (10):

$$265 \quad u_{C_{Rn}}^2 = \left( \frac{C_P C_T}{t \epsilon} \right)^2 (u_{nc_{Po218}})^2 + \left( -\frac{C_P C_T}{t \epsilon} \frac{36}{64} \right)^2 (u_{nc_{Po212}})^2 + \left( - \left[ \frac{nc_{Po218}}{t} - \left( \frac{nc_{Po212}}{t} \frac{36}{64} \right) \right] \frac{C_P C_T}{(\epsilon_0 - b [H_2O])^2} \right)^2 u_{\epsilon_0}^2 +$$

$$\left( \left[ \frac{nc_{Po218}}{t} - \left( \frac{nc_{Po212}}{t} \frac{36}{64} \right) \right] \frac{C_P C_T [H_2O]}{(\epsilon_0 - b [H_2O])^2} \right)^2 u_b^2 + \left( \left[ \frac{nc_{Po218}}{t} - \left( \frac{nc_{Po212}}{t} \frac{36}{64} \right) \right] \frac{C_P C_T b}{(\epsilon_0 - b [H_2O])^2} \right)^2 u_{[H_2O]}^2 + \left( \left[ \frac{nc_{Po218}}{t} - \right. \right.$$

$$\left. \left. \left( \frac{nc_{Po212}}{t} \frac{36}{64} \right) \right] \frac{C_T P_{ref}}{\epsilon P^2} \right)^2 u_P^2 + \left( \left[ \frac{nc_{Po218}}{t} - \left( \frac{nc_{Po212}}{t} \frac{36}{64} \right) \right] \frac{C_P}{\epsilon T_{ref}} \right)^2 u_T^2 \quad (10)$$

270 Table 1 presents the different contributions to the total uncertainty of each radon measurement performed with the ARMON v2. In this example the average radon concentration, water vapour concentration, hourly  $^{212}\text{Po}$  counting, atmospheric Pressure and Temperature from a 6 months intercomparison within the traceRadon project at Saclay Atmospheric Station (SAC) were selected as reference values to perform an estimation. Integration time for radon concentration measurement was of 1 h.

| Quantity     | Estimate                                                                                          | Type                                           | Standard uncertainty                   | Probability distribution | Sensitivity coefficient                                                                                                                    | Contribution to the standard uncertainty |
|--------------|---------------------------------------------------------------------------------------------------|------------------------------------------------|----------------------------------------|--------------------------|--------------------------------------------------------------------------------------------------------------------------------------------|------------------------------------------|
| $X_i$        | $x_i$                                                                                             |                                                | $u(x_i)$                               |                          | $c_i$                                                                                                                                      | $u_i(y)$                                 |
| $nc_{Po218}$ | $nc_{Po218}$                                                                                      | A                                              | $\sqrt{nc_{Po218}}$                    | Normal                   | $\frac{C_P C_T}{t F_{cal}}$                                                                                                                | $c_i u(x_i)$                             |
| $nc_{Po212}$ | $nc_{Po212}$                                                                                      | A                                              | $\sqrt{nc_{Po212}}$                    | Normal                   | $-\frac{C_P C_T}{t F_{cal}} \frac{36}{64}$                                                                                                 | $c_i u(x_i)$                             |
| $\epsilon_0$ | 0.0057<br>(Bq m <sup>-3</sup> ) <sup>-1</sup> s <sup>-1</sup>                                     | B                                              | 0.01 (3%) <sup>(1)</sup>               | Normal                   | $-\left[ \frac{nc_{Po218}}{t} - \left( \frac{nc_{Po212}}{t} \frac{36}{64} \right) \right] \frac{C_P C_T}{(\epsilon_0 - b [H_2O])^2}$       | $c_i u(x_i)$                             |
| $b$          | 5.4 10 <sup>-7</sup><br>(Bq m <sup>-3</sup> ) <sup>-1</sup><br>s <sup>-1</sup> ppmv <sup>-1</sup> | B                                              | 7.3 10 <sup>-8</sup> (2)               | Normal                   | $\left[ \frac{nc_{Po218}}{t} - \left( \frac{nc_{Po212}}{t} \frac{36}{64} \right) \right] \frac{C_P C_T [H_2O]}{(\epsilon_0 - b [H_2O])^2}$ | $c_i u(x_i)$                             |
| $[H_2O]$     | ~254<br>ppmv                                                                                      | B                                              | 20% [H <sub>2</sub> O]<br>+ 1 ppmv (3) | Normal                   | $\left[ \frac{nc_{Po218}}{t} - \left( \frac{nc_{Po212}}{t} \frac{36}{64} \right) \right] \frac{C_P C_T b}{(\epsilon_0 - b [H_2O])^2}$      | $c_i u(x_i)$                             |
| $P$          | ~1000 hPa                                                                                         | B                                              | 0.3 hPa (4)                            | Normal                   | $-\left[ \frac{nc_{Po218}}{t} - \left( \frac{nc_{Po212}}{t} \frac{36}{64} \right) \right] \frac{C_T P_{ref}}{\epsilon P^2}$                | $c_i u(x_i)$                             |
| $T$          | ~298 K                                                                                            | B                                              | 0.15 +<br>0.002 * T (5)                | Normal                   | $\left[ \frac{nc_{Po218}}{t} - \left( \frac{nc_{Po212}}{t} \frac{36}{64} \right) \right] \frac{C_P}{\epsilon T_{ref}}$                     | $c_i u(x_i)$                             |
| $C_{Rn}$     | Eq- (9)                                                                                           | Combined uncertainty (u) (Bq m <sup>-3</sup> ) |                                        |                          |                                                                                                                                            | $u = \sqrt{\sum u_i^2(y)}$               |

<sup>(1)</sup>Uncertainty from the calibration at INTE Radon Chamber

<sup>(2)</sup>Residual -Standard Error from correlation linear model according to calibration at INTE radon chamber.





275 <sup>(3)</sup>From manufacturers documentation

<sup>(4)</sup>From ICOS Atmosphere Station specification, v2.0 (<https://box.lscce.ipsl.fr/index.php/s/uvnKhrEinB2Adw9?path=%2FSpecifications>)

**Table 1: Contributions of the different variable and/or parameters to the total uncertainty of a typical radon concentration measurement performed with the ARMON v2 at an atmospheric station.**

280

As the acquisition chain of the ARMON v2 allows to separate the energy of the alpha particles emitted by the different Polonium isotopes, thus <sup>210</sup>Po counts can be skipped  will be not influencing the instrument background. Interference to the <sup>218</sup>Po counts are only due to <sup>212</sup>Bi as it was explained in section 2.1. Therefore, the typical limits (threshold limit and detection limit) will depend on the presence of thoron within the sampled air.

285 According to the ISO 11929-4, the decision threshold of the activity ( $a^*$ ) can be calculated using Eq. (11):

$$a^* = k_{1-\alpha} \tilde{u}(0) = k_{1-\alpha} w \sqrt{\left(\frac{n_0}{t_g t_0} + \frac{n_0}{t_0^2}\right)} \quad (11)$$

where  $k_{1-\alpha} = 1.645$ ,  $\tilde{u}(0)$  is the standard uncertainty of the background,  $w$  is the calibration factor ( $1/\varepsilon$ ),  $n_0$  is the number of counts of the background effect, and  $t_0$  and  $t_g$  are the count times of the measurement and the background.

The detection limit, according to the same standard, can be calculated, with a 95 % confidence, as in in Eq. (12)

290 
$$a^\# = \frac{2 a^* + (k^2 w)/t_g}{1 - k^2 u_{rel}^2(w)} \quad (12)$$

being the  $u_{rel}(w)$  relative standard uncertainty of the estimated efficiency  $\varepsilon$ .

## 2.5 Evaluation of the linearity of the ARMON v2 detection efficiency for low radon concentrations

The linearity of the detection efficiency of the ARMON v2 was checked thanks to the availability of a new methodology, developed within the WP1 of the traceRadon project too, to create low radon reference atmosphere of few Bq m<sup>-3</sup> using low radon emanation sources developed by radioactivity group of the PTB (Röttger et al., 2023). The ARMON v2 was actually exposed within the climatic chamber of the PTB (see Appendix B, Fig. B1) under radon levels of few tens of Bq m<sup>-3</sup> and during several months.

The PTB chamber has a nominal volume of  $V = (21.035 \pm 0.030) \text{ m}^3$ , which makes a calibration of larger devices inside the chamber possible. This chamber is equipped with a walkable air lock system and can be operated in a temperature range between -20 °C and +40 °C, as well as between 5 % to 95 % relative humidity. The pressure inside the chamber is recorded. The walls of the chamber consist of 100 mm polyurethane foam, clad inside and outside with stainless steel 0.6 mm in thickness. Due to this construction, the heat transmission coefficient is smaller than  $k = 0.2 \text{ W m}^{-2} \text{ K}^{-1}$ , which provides very stable calibration conditions. The inner wall is polished and connected to the ground, thus providing a homogeneous radon progeny field (Honig et al., 1998). Within the chamber the traceable <sup>222</sup>Rn activity concentration is established either via a <sup>222</sup>Rn gas standard (Dersch and Schötzig, 1998) or via primary <sup>226</sup>Ra emanation sources (Mertes et al., 2022). Due to the low activity concentrations values intended during this calibration (5 Bq m<sup>-3</sup> to 20 Bq m<sup>-3</sup>) the emanation source technique was used (Röttger et al., 2023). A <sup>222</sup>Rn free background was achieved, applying aged, synthetic, compressed air to the chamber, flushing all remainders of <sup>222</sup>Rn from it.

310 Extensive experiment over a period of 4 months with varying activity concentrations between  $(7.8 \pm 0.4) \text{ Bq m}^{-3}$  and  $(45.4 \pm 0.8) \text{ Bq m}^{-3}$  have been carried out. Even though dry air had been applied through the background determination, additional silica gel and a thoron delay volume were installed at the inlet of the ARMON v2, to prevent thoron progeny events and humidity during the experiment. All installations and detectors were completely installed inside the climate chamber, which was operated in a closed mode, to prevent any exchange with the surrounding low activity concentration lab air. All results are in consistence with this assumption.



### 3 Results and discussion

#### 3.1 Theoretical efficiency

The EF and its force lines inside the sphere, when  $V = 10$  kV was applied, was modelled with the COMSOL software, and are shown in Fig. 2a. The simulation of the tracks of 10 000 randomly selected particles using this EF (Figures. 2b, 2c and 2d) shows that the 98 % of the  $^{218}\text{Po}^+$  particles generated inside the spherical detection volume are collected inside the active area of the detector if we assume no interactions with other particles, decay or neutralisation. Applying Eq. (4), and assuming that  $\%_{218\text{Po}^+} = 0$ ,  $\%_{\text{Active}} = 0.98$  and  $\%_{\text{Detected}} = 0.5$ , the maximum efficiency of our geometry,  $\epsilon_g$ , in terms of counts detected per disintegrations inside the detection volume will be of 43 %. If we express the efficiency in terms of count rate ( $\text{s}^{-1}$ ) per  $\text{Bq m}^{-3}$ , assuming a detection volume of  $0.02 \text{ m}^{-3}$ , the  $\epsilon_g$  efficiency of our system is  $0.0086 (\text{Bq m}^{-3})^{-1} \text{ s}^{-1}$ .

From the simulation of the trajectories of the 10 000 polonium ions, the estimated travelling time of the particles to reach the detector surface will vary between 0 s and  $1.8 \cdot 10^{-2}$  s, depending on its distance from the detector, with a mean value of  $8.9 \cdot 10^{-3}$  s. During these travelling times, the probability of  $^{218}\text{Po}$  decay events will be completely negligible, while the effect of the recombination with  $\text{OH}^-$  particles will cause a loss of particles from 0 % to 25 % in an interval between 0 ppmv and 2000 ppmv. Consequently, the collection efficiency  $\epsilon_c$  will vary between 100 % at 0 ppmv and 75 % at 2000 ppmv, being 87.6 % at the nominal humidity of 400 ppmv.

Multiplying both geometrical and collection efficiencies, the maximum theoretical efficiency of our system, when no water is present, will be  $\epsilon_0 = 0.0086 (\text{Bq m}^{-3})^{-1} \text{ s}^{-1}$ , while when working at 400 ppmv and 2000 ppmv of  $\text{H}_2\text{O}$  the theoretical  $\epsilon$  will be  $0.0075 (\text{Bq m}^{-3})^{-1} \text{ s}^{-1}$  and  $0.0065 (\text{Bq m}^{-3})^{-1} \text{ s}^{-1}$  respectively. Figure 3 shows the relationship between the estimated theoretical detection efficiency of the ARMON v2 in relation to the water content of the sampled air (blue map).

It should be taken into account that during the simulations some hypotheses were done which may be not completely consistent with the reality: i) no recombination processes of the  $^{218}\text{Po}$  particles were considered; ii) a regular spherical potential surface was considered to generate an EF with spherical symmetry although the real EF is expected to have some irregularities due to the inhomogeneous distribution of the potential over the sphere wall due, among others, to the presence of inlet and outlet tubing connections; iii) no air diffusion effects were considered, iv) it has been observed in the results of the COMSOL simulations that a small vertical shift in the detector position could change the percent of particles collected on the active area of the detector surface. All these previous observations lead to the conclusion that the theoretical efficiency obtained for the ARMON v2 has only to be considered as the ideal highest value and not treated as nominal efficiency of the instrument.

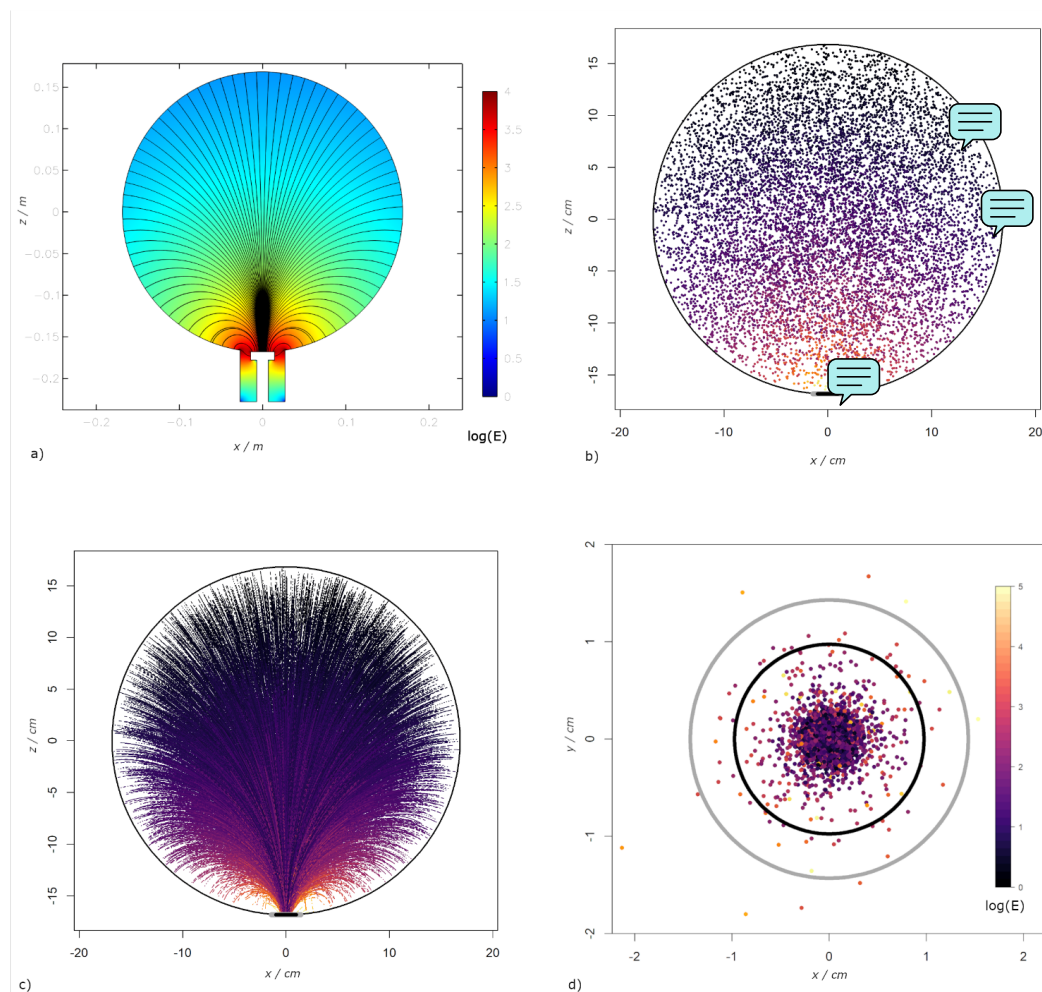

345 **Figure 2. a):** Simulation of the electrostatic field generated within the ARMON v2 detection volume with the application of 10 kV  
 voltage, black lines represent the EF direction; **b):** Initial position inside the detection volume of the simulated  $^{218}\text{Po}$  ions ( $10^5$   
 fictitious particles); **c):** Trajectories of the simulated particles inside the sphere when the 10 kV voltage is applied between the sphere  
 walls and the PIPS detector; **d):** Distribution of the simulated deposition of charged particles at the detector surface. A black  
 circle denotes the active area. The scale for Fig. 2a, 2b and 2c is the logarithm of the EF, in log(V/cm), and it is shown  
 350 in Fig. 2d.

### 3.2 INTE Calibration results

Figure 3 shows the results of the water correction experiments carried out at the INTE-UPC and PTB chambers. A linear  
 relationship between the detection efficiency of the instrument and the water vapour concentration is observed within a range  
 of 150 ppmv - 2000 ppmv. This relationship was found to be independent on the radon concentration in a range of 600 Bq m<sup>-3</sup>  
 355 - 5900 Bq m<sup>-3</sup>. When the water vapour concentration of the sampled air is above 2000 ppmv the relation loses this linearity  
 and for this reason it is worth not to measure over this vapour concentration. In the range 150 ppmv - 2000 ppmv, the detection  
 efficiency of the ARMON v2 may be corrected using Eq. (2) with  $b$  being equal to  $5.4 \cdot 10^{-7} (\text{Bq m}^{-3})^{-1} \text{ s}^{-1} \text{ ppmv}^{-1}$  with an  
 uncertainty (RSE) of  $7.3 \cdot 10^{-8} (\text{Bq m}^{-3})^{-1} \text{ s}^{-1} \text{ ppmv}^{-1}$ .



Due to the increment observed in the detection efficiency for values of water vapour concentration lower than 150 ppmv, an exponential correction fit was also applied to the data following Eq. 13.

$$365 \quad \varepsilon = \varepsilon'_0 e^{(b' [H_2O]^{1/2})} \quad (13)$$

The exponential curve (green dashed line) is also represented in Fig. 3 and may be more appropriate for very low water concentrations which are usually uncommon for sampled air at atmospheric stations. For this reason, the use of the linear fit is here proposed.

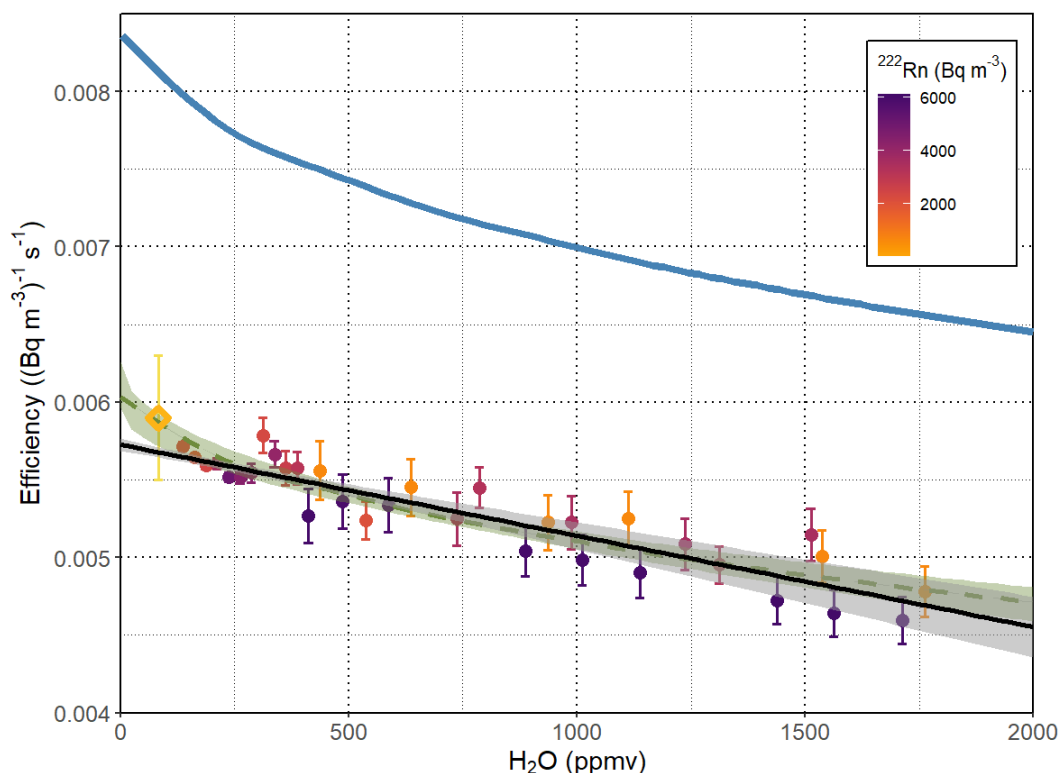

370 Figure 3: Dependence of the efficiency of the ARMON v2 monitor on to the water vapour concentration (in ppmv H<sub>2</sub>O) at the  
 375 detection volume. The coloured points are efficiency averages and its uncertainty in intervals of 10 ppmv of H<sub>2</sub>O, of the efficiency of  
 the hourly measurements for all the calibrations at INTE-UPC. The black line is the linear fit of the observational points with the  
 95 % confidence interval represented by the grey shaded zone. The green dotted curve is the exponential fit of the observational  
 points with the 95 % confidence interval represented by the green shaded zone. The blue line represents the efficiency of the  
 ARMON at PTB with its uncertainty. The blue curve represents the theoretical efficiency simulation assuming a mobility of  
 3 cm<sup>2</sup> (V s)<sup>-1</sup>.

Once determined the water correction coefficient  $b$ , the efficiency of the monitor  $\varepsilon_0$  was calculated within the radon  
 concentration range of 500 Bq m<sup>-3</sup> - 6000 Bq m<sup>-3</sup>. From the results obtained (Fig. 4), a high linearity ( $r^2 = 0.999$ ) in the  
 380 regression between <sup>218</sup>Po counts against <sup>222</sup>Rn concentration measured with the ATMOS monitor was observed. Within the  
 calibration range (300 Bq m<sup>-3</sup> - 6200 Bq m<sup>-3</sup>), and taking in consideration the ATMOS uncertainty, the  $\varepsilon_0$  of the ARMON v2  
 calculated with the ATMOS monitor at the INTE chamber was of  $(0.0057 \pm 0.0002)$  (Bq m<sup>-3</sup>) s<sup>-1</sup>.

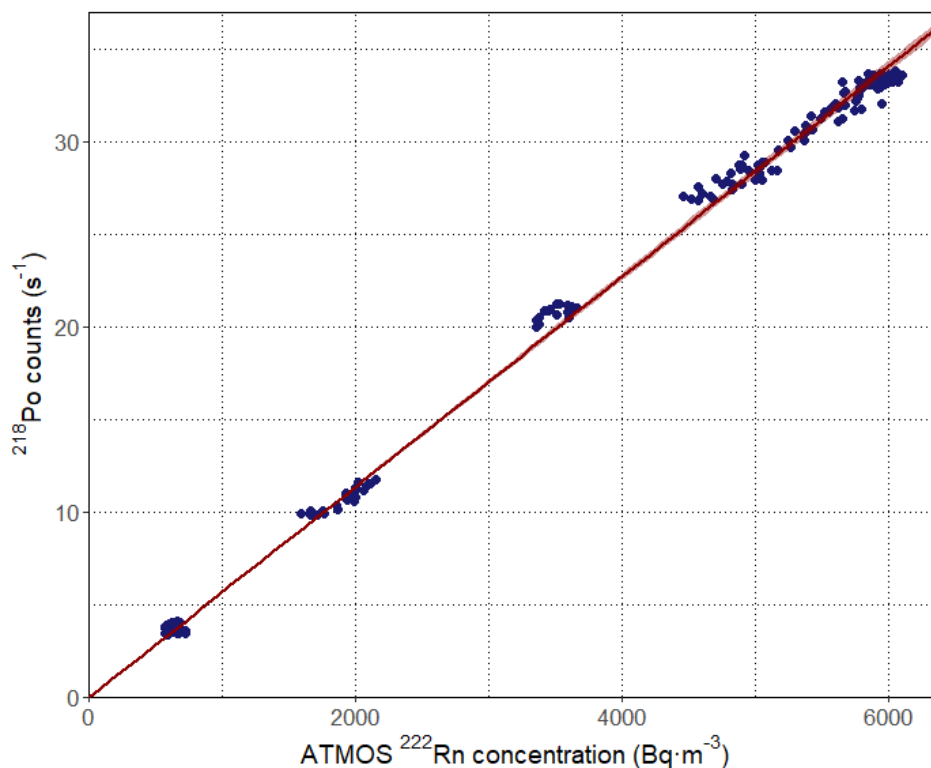

385 **Figure 4:** Calibration of the efficiency of the ARMON v2 monitor ( $^{218}\text{Po}$  counts against  $^{222}\text{Rn}$  concentration) within the range 0  $\text{Bq m}^{-3}$  – 6000  $\text{Bq m}^{-3}$ .  $^{222}\text{Rn}$  concentration measured with an ATMOS monitor at the INTE-UPC radon chamber (hourly means).  $^{218}\text{Po}$  counts ( $\text{s}^{-1}$ ) from hourly spectra. Red line is the regression line ( $r^2 = 0.999$ ).

It has to be underlined that the experimental efficiency of the ARMON v2 range between 300 ppmv - 2000 ppmv of  $[\text{H}_2\text{O}]$  is  $\sim 24\%$  lower than the theoretical one (assuming a mobility of  $3 \text{ cm}^2 (\text{V s})^{-1}$ ). Although in the same order of magnitude, this difference could be explained, as described in section 3.1, by a multitude of variables which could cause the  $^{218}\text{Po}$  ions not to be collected at the detector surface.

### 3.3 Uncertainty, background and typical limits

The total uncertainty of the radon measurements performed with the ARMON v2 is calculated with Eq. (9). As example here it has been estimated for a typical atmospheric hourly radon measurement performed at the SAC atmospheric site ( $C_{\text{Rn}} = 4 \text{ Bq m}^{-3}$ ,  $T = 298 \text{ K}$ ,  $P = 1000 \text{ hPa}$ ,  $[\text{H}_2\text{O}] = 250 \text{ ppmv}$  and  $nc_{p0212} = 1$ ). The uncertainty values for all parameters and its sensitivity coefficients are shown in Table 2. The combined uncertainty obtained was  $0.46 \text{ Bq m}^{-3}$ , of the absolute value of the measurement. The most influencing contribution in the calculation of the total uncertainty of the measurement is the uncertainty of the total net  $^{218}\text{Po}$  counts, followed by the uncertainty of the detection efficiency and the uncertainty of the water vapour correction factor.

400 Calculating the variability for a range of humidity (0 ppmv - 2000 ppmv), the total uncertainty of the measure has been plotted as a function of radon concentration (Fig. 5a). In the range of 0 ppmv – 400 ppmv, the total uncertainty is below the 10 % for radon concentrations greater than  $5 \text{ Bq m}^{-3}$ . For humidity greater than 1000 ppmv, the uncertainty increases due to the decrease of the detection efficiency.



| Quantity     | Estimate                                                         | Type                                      | Standard uncertainty | Probability distribution | $\nu_i$  | Sensitivity coefficient | Contribution to the standard uncertainty |      |
|--------------|------------------------------------------------------------------|-------------------------------------------|----------------------|--------------------------|----------|-------------------------|------------------------------------------|------|
| $X_i$        | $x_i$                                                            |                                           | $u(x_i)$             |                          |          | $c_i$                   | $u_i(y)$                                 |      |
| $nc_{Po218}$ | 81                                                               | A                                         | 9                    | Normal                   | $\infty$ | 0.0496                  | 0.4466                                   |      |
| $nc_{Po212}$ | 1                                                                | A                                         | 1                    | Normal                   | $\infty$ | -0.0279                 | -0.0279                                  |      |
| $\epsilon_0$ | 0.0057<br>( $Bq\ m^{-3}\ s^{-1}$ )                               | B                                         | 0.01                 | Normal                   | $\infty$ | -11.671                 | -0.1225                                  |      |
| $b$          | $5.4\ 10^{-7}$<br>( $Bq\ m^{-3}\ s^{-1}$ )<br>ppmv <sup>-1</sup> | B                                         | $7.3\ 10^{-8}$       | Normal                   | $\infty$ | 2917.7                  | 0.0117                                   |      |
| $[H_2O]$     | ~250 ppmv                                                        | B                                         | 51.8                 | Normal                   | $\infty$ | $3.73\ 10^{-4}$         | 0.0190                                   |      |
| $P$          | ~1000 hPa                                                        | B                                         | 0.3                  | Normal                   | $\infty$ | $-4.00\ 10^{-3}$        | -0.0012                                  |      |
| $T$          | ~298 K                                                           | B                                         | 0.746                | Normal                   | $\infty$ | $1.1339\ 10^{-2}$       | 0.0100                                   |      |
| $C_{Rn}$     | 4.0 $Bq\ m^{-3}$                                                 | Combined uncertainty (u) ( $Bq\ m^{-3}$ ) |                      |                          |          |                         |                                          | 0.46 |

405 **Table 2.** Calculated contributions of the different variable and/or parameters to the total uncertainty of a typical radon concentration measurement performed with the ARMON v2 at an atmospheric station.

In addition, given a typical water content in sampled air of 250 ppmv H<sub>2</sub>O, the total uncertainty of the measurement has been also calculated taking into account different possible levels of thoron gas in the sample (Fig. 5b). It can be observed that when the radon concentration increases to tens of  $Bq\ m^{-3}$ , the thoron concentration present in the sampled air has almost no effect on the uncertainty of the measurement. However, at low radon concentrations below 5  $Bq\ m^{-3}$ , the thoron concentration can be an important source of uncertainty. This problem can be easily sketched using a thoron decay volume before the ARMON v2 detection volume.

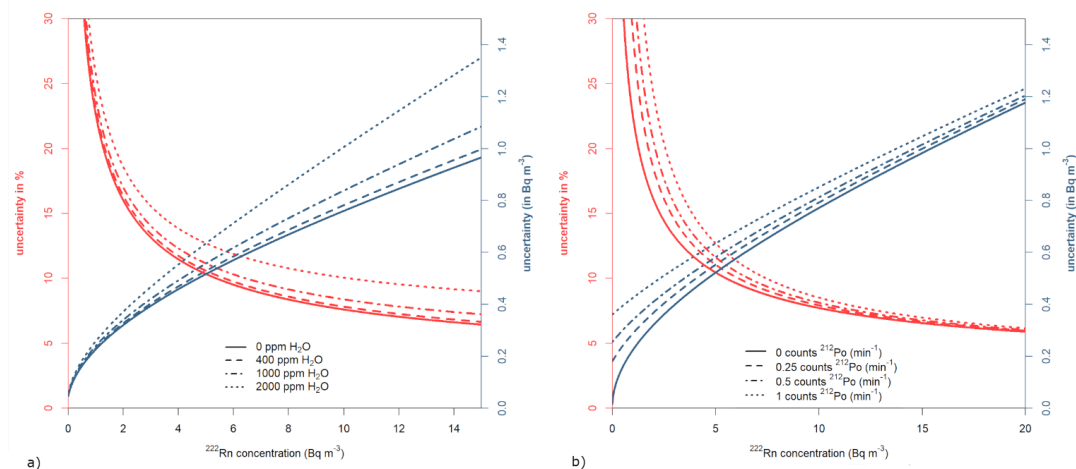

415 **Figure 5:** a): absolute (blue) and relative (red) uncertainty as a function of <sup>222</sup>Rn activity concentration at different water vapour concentrations. b): absolute (blue) and relative (red) uncertainty as a function of <sup>222</sup>Rn activity concentration at different <sup>212</sup>Po (thoron decay) concentrations.

As an additional information, it may be of interest to explain that during the INTE-UPC experiments it was discovered that the silica gel material may contain thorium material which is a thoron source. Actually, hourly spectra showed up to 1 count per minute (min<sup>-1</sup>) of <sup>212</sup>Po, which means 0.56 counts (min<sup>-1</sup>) of <sup>212</sup>Bi  $\alpha$ -decays to <sup>208</sup>Tl and this implies an increase greater than 50 % of the uncertainty for radon concentrations below 5  $Bq\ m^{-3}$ . For this reason, and although the content of thorium



material within commercial silica gel has not yet been quantitatively estimated, authors highly recommend  not use this dryer for radon measurements or using a delay volume of at least 10 L between the Silica Gel dryer and the selected radon instrument. Generally, authors suggest the use of other drying systems as Nafion tubes or cold traps.

In regard to the detection limit and the decision threshold of the ARMON v2, these previous values  are dependent on the presence of thoron concentrations within the detection volume. When no thoron counts are present (e.g. when using a buffer volume before the ARMON v2), the decision threshold is 0 Bq m<sup>-3</sup> and the detection limit is  $a^{\#} = 0.132$  Bq m<sup>-3</sup>. At a typical thoron concentration at atmospheric sites (100 m tall towers) of 0.017 min<sup>-1</sup>, the detection limit and the decision threshold are 0.3 Bq m<sup>-3</sup> and 0.08 Bq m<sup>-3</sup> respectively. The change of the characteristic limits as a function of the <sup>212</sup>Po detected count rate in min<sup>-1</sup> is shown in Fig. 6.

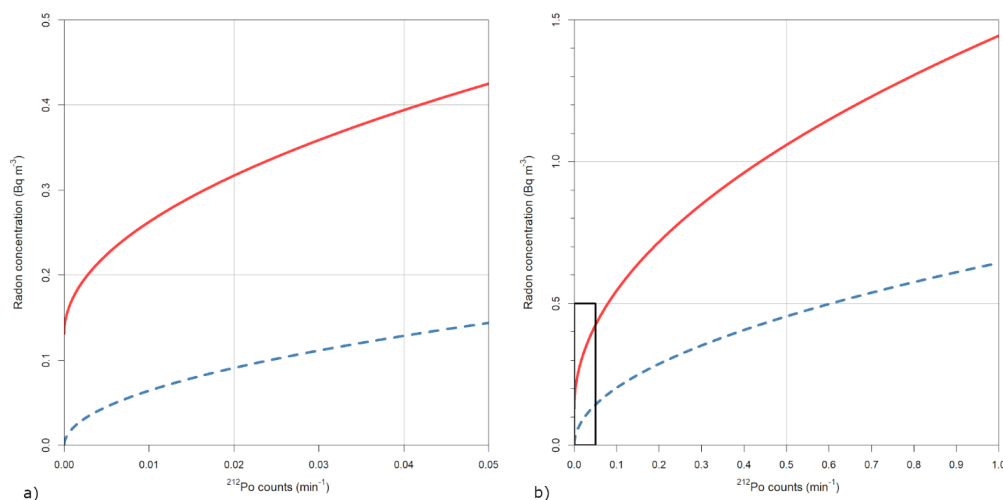

435 **Figure 6: Radon activity concentration detection limit (red straight) and decision threshold (dashed blue) of the ARMON v2 monitor from a) 0 counts to 0.05 counts (min<sup>-1</sup>) and b) 0 counts to 1 count (min<sup>-1</sup>) of <sup>212</sup>Po detected.**

### 3.4 PTB results

Figure 7 shows a summary of the results of the values of the detection efficiency of the ARMON v2 obtained by INTE-UPC (orange dots) and PTB (blue dots) experiments. Both experiments, carried out under different conditions of radon concentrations, show a linearity in the counts detected by the instrument and the radon concentrations to be measured (Figure 7a). Totally, five calibration points with three different emanation sources were realised at the PTB (see Appendix B Fig. B2).

During the ARMON v2 exposures at the PTB climate chamber, no variation of the humidity was investigated and the sampled air had an average water content of  $83 \pm 21$  ppmv, during the whole measurement campaign (Fig. 3, gold rhombus) and the estimated detection efficiency was corrected applying Eq 2.

Since five calibration points with three different emanation sources were realised (see Appendix B Fig. B2)  the characterisation of the sources had been done with the same instruments, the correlation  between the sources and their influence on the resulting uncertainty has to be further investigated in detail. A full correlation of the sources and their uncertainties was considered at this point, which probably overestimates the total uncertainty of the calibration and increases the uncertainty about a factor of two, with respect to just ignoring the correlation.





Taking all this into account, the sensitivity of the ARMON v2 that was determined during the calibration described in section 455 2.5 is  $(0.00595 \pm 0.0008) (\text{Bq m}^{-3})^{-1} \text{ s}^{-1}$ . This result is in good agreement with the one obtained from INTE-UPC exposures as previously reported in 3.2. The offset determined during this calibration is with  $(0.002 \pm 0.007) \text{ s}^{-1}$  in good agreement with the theoretical 0.

The detection efficiency of the ARMON v2, within its uncertainty, do not change when the radon concentrations vary between 460 few  $\text{Bq m}^{-3}$  and thousands of  $\text{Bq m}^{-3}$  (Figure 7b). This is an important output which confirms the robustness of this instrument and its response. This last result also allows to accept and to use the detection efficiency value obtained at high radon concentrations and for this reason with a much smaller uncertainty. Additionally, the stability of the linearity in time and in a wide range of radon concentrations of the detection efficiency of the ARMON v2, pro<sup>u</sup>itability to be used as a transfer standard for in situ calibration and/or comparison of others radon and radon progeny monitors.

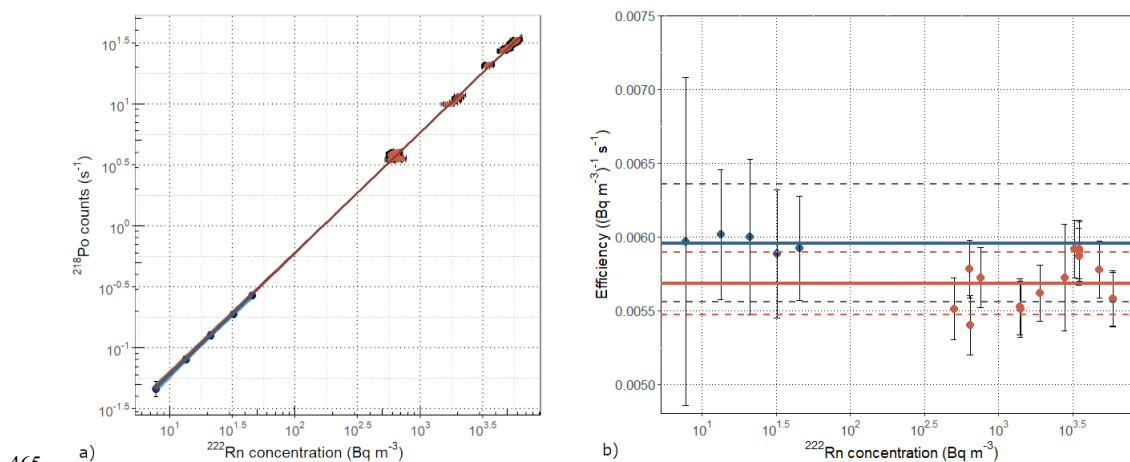

465 **Figure 7: a) Counts per second versus radon concentration (dots) and regression lines for the detection efficiency obtained during INTE-UPC experiments (orange) and PTB experiments (blue), with the 99 % confidence level shadowed. b) Dots: detection efficiency of the ARMON v2 and its uncertainty versus radon concentration for the different exposures at PTB (blue) and INTE-UPC (orange). Solid lines are the mean of the efficiency values obtained at PTB (blue) and INTE (orange), with its uncertainty at  $k=1$  (dashed lines).**  
470 X axis for both figures and Y axis for figure 7a are in logarithmic scale.

It needs to be underlined that, if the exponential correction was used for the water vapour conditions (Fig. 3), the detection efficiency obtained by INTE-UPC and PTB experiments will be even more similar for both calibrations, as  $\varepsilon'_0$  will be estimated to 0.0061 and 0.0062 for INTE-UPC and PTB calibrations, respectively.

#### 475 4 Summary, conclusions and further steps

In this paper, a new version of the Atmospheric Radon MONitor (ARMON) is described. This new version is more robust and transportable than the previous prototype, can be easily installed at atmospheric stations and can be remotely controlled thank to a GUI window.

480 For the first time ever, the response of the ARMON v2 has been fully characterized by both theoretical and experimental approaches to obtain its detection efficiency for different radon concentrations, spanning between few  $\text{Bq m}^{-3}$  and thousands of  $\text{Bq m}^{-3}$ . A total uncertainty budget of the ARMON v2 monitor has been also carried out for the first time. Independent



experiments were carried out both at the INTE-UPC radon chamber and at the PTB climate chamber in the framework of the European project traceRadon.

485

The monitor detection efficiency was found to be  $(0.0057 \pm 0.0002) (\text{Bq m}^{-3})^{-1} \text{ s}^{-1}$  according to the INTE-UPC exposures results, and of  $(0.00595 \pm 0.0008) (\text{Bq m}^{-3})^{-1} \text{ s}^{-1}$  according to the PTB experiments. The combined uncertainty of the ARMON v2 is lower than 10 % for radon activity values higher than  $5 \text{ Bq m}^{-3}$  and the detection limit  $0.132 \text{ Bq m}^{-3}$  when no thoron concentration is present in the sampled air. The theoretical detection efficiency was of  $(0.0075 (\text{Bq m}^{-3})^{-1} \text{ s}^{-1})$ , which is

490

a 27 % higher than the real one, assuming that there are factors that were not taken into account as possible irregularities of the Electrostatic Field or recombination of  $^{218}\text{Po}^+$  ions with other particles.

The linearity of the ARMON v2 response observed thanks to the INTE-UPC and PTB experiments allows the instrument to be calibrated at high concentration values and thus to reduce the calibration uncertainty.

495

In addition to the present full characterization of the ARMON v2, another completely different calibration method based on short pulse of  $^{222}\text{Rn}$  was applied at PTB in the framework of the same traceRadon project. Due to the special features of the ARMON v2 detector, this will allow for very short calibration or recalibration, also outside a calibration chamber and under field conditions. Results are still under investigation and will be the object of a future paper. Finally, the ARMON v2 was also

500

compared under field conditions with the new ANSTO 200 L (Chambers et al., 2022) and its results will be published in a scientific paper.

From the results of the present study, it can be confirmed that the ARMON v2 can be considered a good transfer standard for in situ calibration of radon and radon progeny monitors installed at atmospheric sites according to the requirements of the atmospheric radon community.

505

#### Appendix A. ARMON v2 supplementary figures

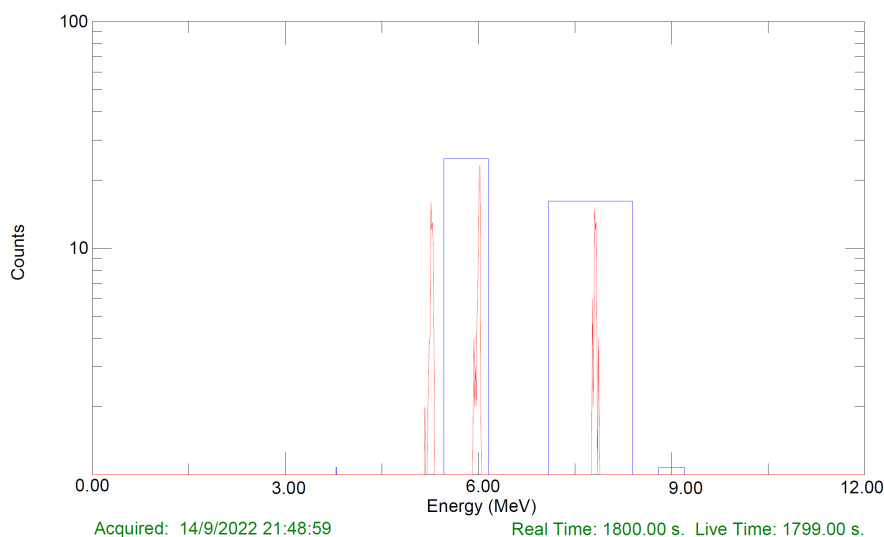

Figure A1 . Typical spectrum from the ARMON monitor with the  $^{210}\text{Po}$  (5.30 MeV),  $^{218}\text{Po}$  (6.0 MeV) and  $^{214}\text{Po}$  (7.69 MeV) peaks observed. No  $^{212}\text{Po}$  and  $^{214}\text{Po}$  counts are observed.

510

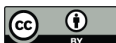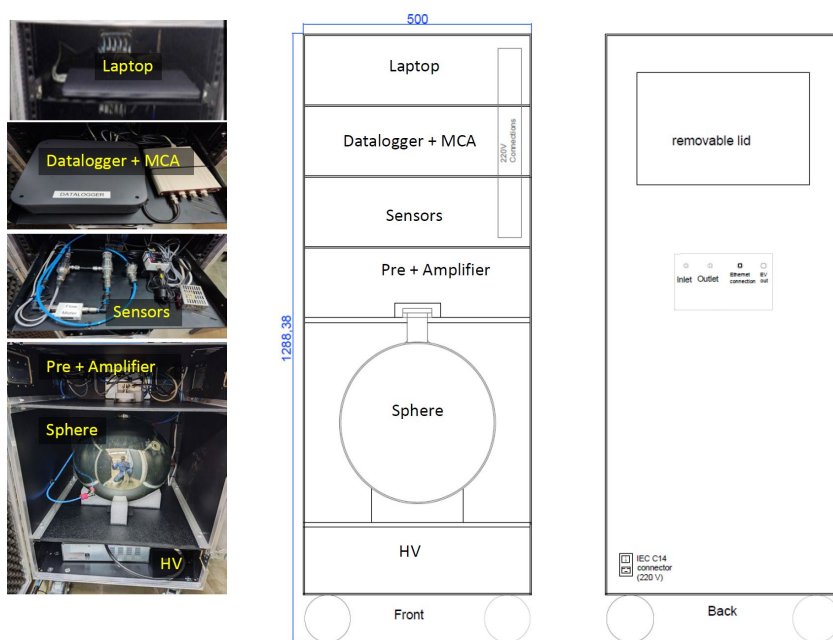

Figure A2. ARMON monitor. Left: Trays and parts. Middle and right: inside and back drawing.

515

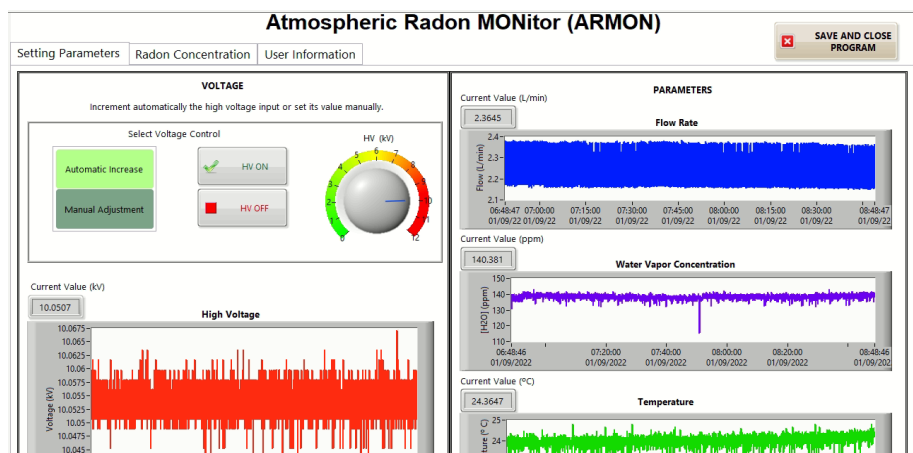

a)

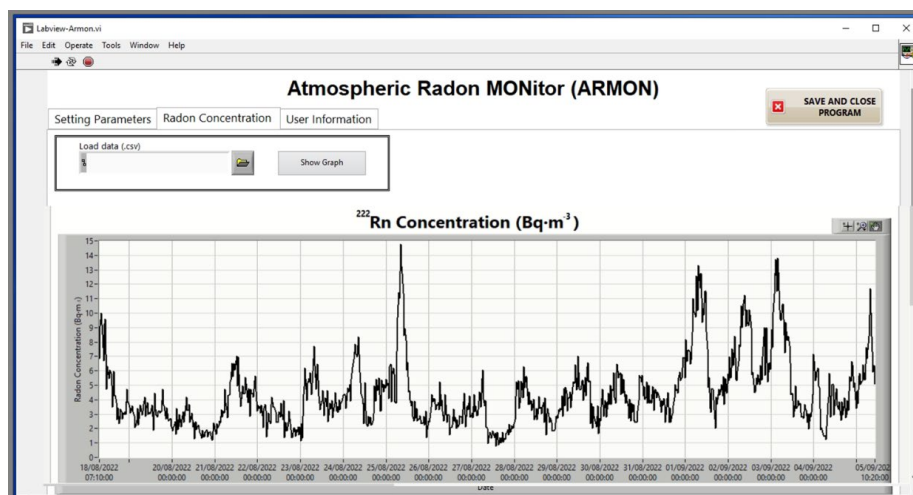

b)

520 **Figure A3.** User interface of the new ARMON monitor. a) Sensor and voltage control b) Radon concentration visualization tab.

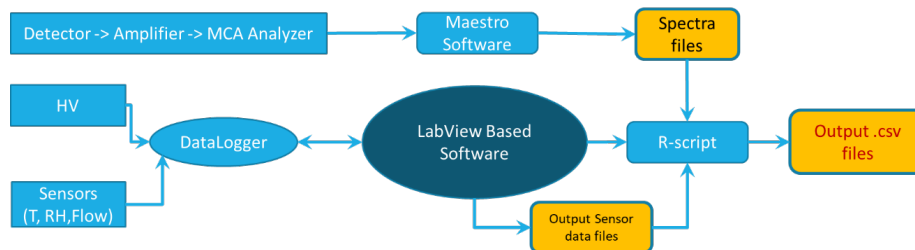

**Figure A4.** Data flow chart of the ARMON v2.

525



### Appendix B. Calibration at PTB climatic chamber supplementary figures

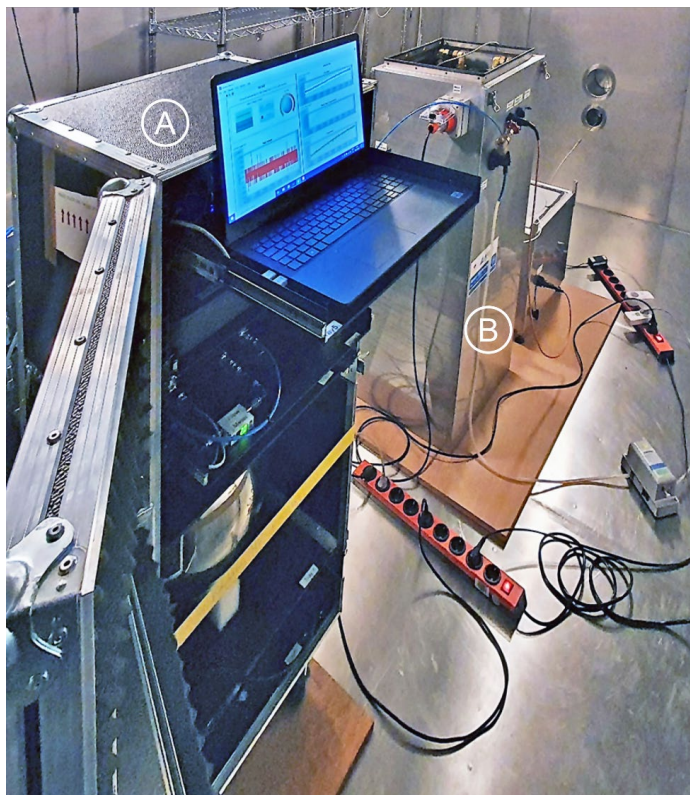

Figure B1: Picture of the calibration setup of the ARMON v2 in the calibration chamber at PTB. In the foreground you see the opened case of the ARMON v2 (A) and in the background a monitoring system developed by ANSTO (B) (Chambers et al., 2022).

530

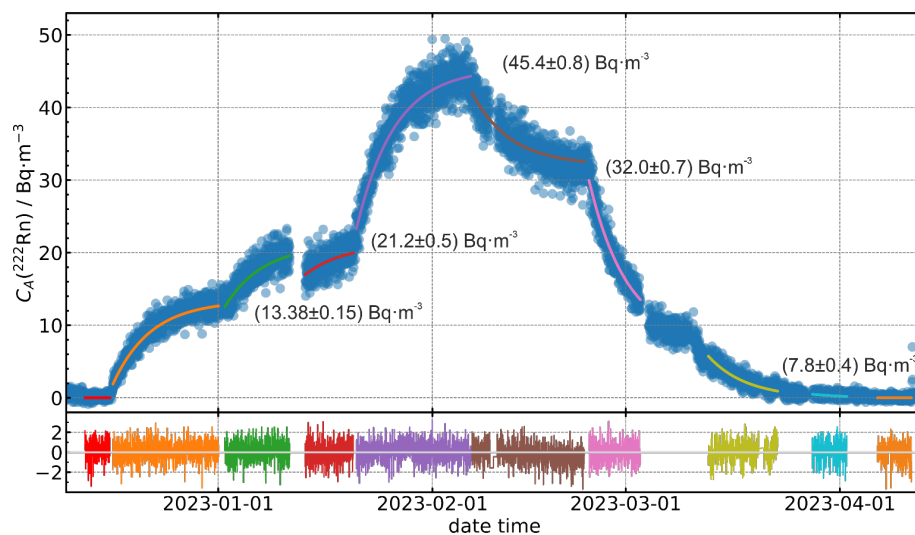

Figure B2: Radon activity concentration determined with the ARMON v2 using three different emanation sources in five combinations. The values given in the figure illustrate the equilibrium activity concentration reached after infinite time with this source combination. The blue dots show the measured results of the ARMON v2 acquired during 30 min per point. The coloured



535 **lines show the modelled activity concentration determined from the emanation sources combination. The respective coloured lines in the lower graph show the relative residual between model and measurement, which proofs the excellent agreement.**

#### **Code availability**

The data and codes for this paper are available at the CORA Repositori de Dades de Recerca with doi  
540 <https://doi.org/10.34810/data893>.

#### **Data availability**

The data and codes for this paper are available at the CORA Repositori de Dades de Recerca with doi  
<https://doi.org/10.34810/data893>.

#### **Author contributions**

545 RC in the framework of his PhD project built the new version of the ARMON, ran the calibration experiments at the INTE-UPC and analysed the data with heir corresponding uncertainties. RG and CG designed the COMSOL setting simulations for the theoretical efficiency analysis. AV and CG supervised the work as PI and co-PIs of the MAREA project and senior researchers of the traceRadon project. SR carried out the ARMON v2 exposures at the PTB and the relative data analysis. RC led the manuscript writing and all authors contribute to it. All authors have read and agreed to the published version of the  
550 paper.

#### **Competing interests**

The authors declare that they have no conflict of interests.

#### **Acknowledgments**

The authors want to acknowledge Annette Röttger as coordinator of the traceRadon project for her work and continuous  
555 support. The authors also want to acknowledge Liza Shiro for her work in the developing of the ARMON-Labview program, Juan Antonio Romero for his support during the ARMON v2 building, Anja Honig and Tanita Ballé for their support during the ARMON exposures at the PTB and Florian Mertes for his interesting ideas during the development of the low radon emanation sources of the PTB.

#### **Financial support**

560 This project was financed by the MAR2EA (IU68-017047) project and the 19ENV01 traceRadon project, which has received funding from the EMPIR programme co-financed by the Participating States and from the European Union's Horizon 2020 research and innovation programme.

#### **References**

Arnold, D., Vargas, A., Vermeulen, A. T., Verheggen, B. and Seibert, P.: Analysis of radon origin by backward atmospheric  
565 transport modelling, Atmos. Environ., 44(4), 494–502, doi:10.1016/j.atmosenv.2009.11.003, 2010.  
Baskaran, M.: Po-210 and Pb-210 as atmospheric tracers and global atmospheric Pb-210 fallout: a Review, J. Environ.



- Radioact., 102(5), 500–513, doi:10.1016/j.jenvrad.2010.10.007, 2011.
- Baskaran, M.: Radon: A Tracer for Geological, Geophysical and Geochemical Studies, Springer International Publishing, Cham., 2016.
- 570 BIPM, IEC, IFCC, ILAC, ISO, IUPAC, IUPAP and OIML: Evaluation of measurement data - Guide to the expression of uncertainty in measurement, [online] Available from: [https://www.bipm.org/documents/20126/2071204/JCGM%5C\\_100%5C\\_2008%5C\\_E.pdf/cb0ef43f-baa5-11cf-3f85-4dcd86f77bd6](https://www.bipm.org/documents/20126/2071204/JCGM%5C_100%5C_2008%5C_E.pdf/cb0ef43f-baa5-11cf-3f85-4dcd86f77bd6), 2008.
- Chambers, S., Williams, A. G., Zahorowski, W., Griffiths, A. and Crawford, J.: Separating remote fetch and local mixing influences on vertical radon measurements in the lower atmosphere, *Tellus, Ser. B Chem. Phys. Meteorol.*, 63(5), 843–859, doi:10.1111/j.1600-0889.2011.00565.x, 2011.
- Chambers, S., Williams, A., Griffiths, A., Podstawczyńska, A., Pawlak, W. and Fortuniak, K.: Characterizing the State of the Urban Surface Layer Using Radon-222, *J. Geophys. Res.*, 124(2), doi:10.1029/2018JD029507, 2019.
- Chambers, S. D., Williams, A. G., Conen, F., Griffiths, A. D., Reimann, S., Steinbacher, M., Krummel, P. B., Steele, L. P., 580 van der Schoot, M. V., Galbally, I. E., Molloy, S. B. and Barnes, J. E.: Towards a universal “Baseline” characterisation of air masses for high- and low-altitude observing stations using radon-222, *Aerosol Air Qual. Res.*, 16(3), 885–899, doi:10.4209/aaqr.2015.06.0391, 2016.
- Chambers, S. D., Griffiths, A. D., Williams, A. G., Sisoutham, O., Morosh, V., Röttger, S., Mertes, F. and Röttger, A.: Portable two-filter dual-flow-loop 222Rn detector: stand-alone monitor and calibration transfer device, *Adv. Geosci.*, 57, 63–80, 585 doi:10.5194/adgeo-57-63-2022, 2022.
- Conen, F. and Robertson, L. B.: Latitudinal distribution of radon-222 flux from continents, *Tellus B Chem. Phys. Meteorol.*, 54(2), 127–133, doi:10.3402/tellusb.v54i2.16653, 2002.
- Dankelmann, V., Reineking, A. and Postend rfer, J.: Determination of Neutralisation Rates of 218Po Ions in Air, *Radiat. Prot. Dosimetry*, 94(4), 353–357, doi:10.1093/oxfordjournals.rpd.a006510, 2001.
- 590 Dersch, R. and Schötzig, U.: Production and measurement of 222Rn standards, *Appl. Radiat. Isot.*, 49(9–11), 1171–1174, doi:10.1016/S0969-8043(97)10040-9, 1998.
- Galmarini, S.: One year of 222Rn concentration in the atmospheric surface layer, *Atmos. Chem. Phys.*, 6(10), 2865–2887, doi:10.5194/acp-6-2865-2006, 2006.
- Goldstein, S. D. and Hopke, P. K.: Environmental Neutralization of Polonium-218, *Environ. Sci. Technol.*, 19(2), 146–150, 595 doi:10.1021/es00132a006, 1985.
- Grossi, C.: 222Rn as a tracer for air mass transport characterization at 100-m-high tower in the south-west Spanish coast. [online] Available from: <http://www.tdx.cat/handle/10803/125236>, 2012.
- Grossi, C., Arnold, D., Adame, J. A., López-Coto, I., Bolívar, J. P., De La Morena, B. A. and Vargas, A.: Atmospheric 222Rn concentration and source term at El Arenosillo 100 m meteorological tower in southwest Spain, *Radiat. Meas.*, 47(2), 149– 600 162, doi:10.1016/j.radmeas.2011.11.006, 2012.
- Grossi, C., Àgueda, A., Vogel, F. R., Vargas, A., Zimnoch, M., Wach, P., Martín, J. E., López-Coto, I., Bolívar, J. P., Morguá, J. A. and Rodó, X.: Analysis of ground-based 222Rn measurements over Spain: Filling the gap in southwestern Europe, *J. Geophys. Res. Atmos.*, 121(18), 11,021–11,037, doi:10.1002/2016JD025196, 2016.
- Grossi, C., Vogel, F. R., Curcoll, R., Àgueda, A., Vargas, A., Rodó, X., Morguá, J.-A., Grossi, C., Vogel, F. R. and By, C. C.: 605 Study of the daily and seasonal atmospheric CH<sub>4</sub> mixing ratio variability in a rural Spanish region using 222Rn tracer, *Atmos. Chem. Phys.*, 18(8), 5847–5860, doi:10.5194/acp-18-5847-2018, 2018.
- Grossi, C., Chambers, S. D., Llido, O., Vogel, F. R., Kazan, V., Capuana, A., Werczynski, S., Curcoll, R., Delmotte, M., Vargas, A., Morguá, J.-A., Levin, I. and Ramonet, M.: Intercomparison study of atmospheric 222Rn and 222Rn progeny monitors, *Atmos. Meas. Tech.*, 13(5), 2241–2255, doi:10.5194/amt-13-2241-2020, 2020.



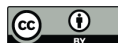

- 610 Gutiérrez-Álvarez, I., Guerrero, J. L., Martín, J. E., Adame, J. A., Vargas, A. and Bolívar, J. P.: Radon behavior investigation based on cluster analysis and atmospheric modelling, *Atmos. Environ.*, 201(December 2018), 50–61, doi:10.1016/j.atmosenv.2018.12.010, 2019.
- Hernández-Ceballos, M. A., Vargas, A., Arnold, D. and Bolívar, J. P.: The role of mesoscale meteorology in modulating the <sup>222</sup>Rn concentrations in Huelva (Spain) - impact of phosphogypsum piles, *J. Environ. Radioact.*, 145, 1–9, doi:10.1016/j.jenvrad.2015.03.023, 2015.
- 615 Hirao, S., Yamazawa, H. and Moriizumi, J.: Estimation of the Global <sup>222</sup>Rn Flux Density from the Earth's Surface, *Japanese J. Heal. Phys.*, 45(2), 161–171, doi:10.5453/jhps.45.161, 2010.
- Honig, A., Paul, A., Röttger, S. and Keyser, U.: Environmental control of the German radon reference chamber, *Nucl. Instruments Methods Phys. Res. Sect. A Accel. Spectrometers, Detect. Assoc. Equip.*, 416(2–3), 525–530, doi:10.1016/S0168-620 9002(98)00788-8, 1998.
- Hopke, P. K.: Use of Electrostatic Collection of <sup>218</sup>Po for Measuring Rn, *Health Phys.*, 57(1), 39–42, doi:10.1097/00004032-198907000-00005, 1989.
- ICOS RI: ICOS Atmosphere Station Specifications V2.0 (editor: O. Laurent), 2020.
- Jacob, D. J. and Prather, M. J.: Radon-222 as a test of convective transport in a general circulation model, *Tellus B*, 42(1), 625 118–134, doi:10.1034/j.1600-0889.1990.00012.x, 1990.
- Karstens, U., Schwingshackl, C., Schmithüsen, D. and Levin, I.: A process-based <sup>222</sup>radon flux map for Europe and its comparison to long-term observations, *Atmos. Chem. Phys.*, 15(22), 12845–12865, doi:10.5194/acp-15-12845-2015, 2015.
- Levin, I., Glatzel-Mattheier, H., Marik, T., Cuntz, M., Schmidt, M. and Worthy, D. E.: Verification of German methane emission inventories and their recent changes based on atmospheric observations, *J. Geophys. Res. Atmos.*, 104(D3), 3447–630 3456, doi:10.1029/1998JD100064, 1999.
- Levin, I., Born, M., Cuntz, M., Langendörfer, U., Mantsch, S., Naegler, T., Schmidt, M., Varlagin, A., Verclas, S. and Wagenbach, D.: Observations of atmospheric variability and soil exhalation rate of radon-222 at a Russian forest site. Technical approach and deployment for boundary layer studies, *Tellus B Chem. Phys. Meteorol.*, 54(5), 462–475, doi:10.3402/tellusb.v54i5.16681, 2002.
- 635 Levin, I., Karstens, U., Hammer, S., DellaColetta, J., Maier, F. and Gachkivskyi, M.: Limitations of the radon tracer method (RTM) to estimate regional greenhouse gas (GHG) emissions – a case study for methane in Heidelberg, *Atmos. Chem. Phys.*, 21(23), 17907–17926, doi:10.5194/acp-21-17907-2021, 2021.
- Mertes, F., Röttger, S. and Röttger, A.: Development of <sup>222</sup>Rn Emanation Sources with Integrated Quasi  $2\pi$  Active Monitoring, *Int. J. Environ. Res. Public Health*, 19(2), 840, doi:10.3390/ijerph19020840, 2022.
- 640 Nazaroff, W. and Nero, A. V.: Radon and its decay products in indoor air, John Wiley and Sons Inc, New York, NY (USA), 1988.
- ORTEC: MAESTRO v7.0 User's Manual, [online] Available from: <https://www.ortec-online.com/-/media/ametekortec/manuals/a/a65-mnl.pdf?la=en&revision=f2f3ed3f-fa2d-4185-9301-7d480b0a6955>, 2012.
- Pal, S., Lopez, M., Schmidt, M., Ramonet, M., Gibert, F., Xueref-Remy, I. and Ciais, P.: Investigation of the atmospheric 645 boundary layer depth variability and its impact on the <sup>222</sup>Rn concentration at a rural site in France, *J. Geophys. Res. Atmos.*, 120(2), 623–643, doi:10.1002/2014JD022322, 2015.
- Pugliese, M., Baiano, G., Boiano, A., D'Onofrio, A., Roca, V., Sabbarese, C. and Vollaro, P.: A compact multiparameter acquisition system for radon concentration studies, *Appl. Radiat. Isot.*, 53(1–2), 365–370, doi:10.1016/S0969-8043(00)00154-8, 2000.
- 650 Radulescu, I., Calin, M. R., Luca, A., Röttger, A., Grossi, C., Done, L. and Ioan, M. R.: Inter-comparison of commercial continuous radon monitors responses, *Nucl. Instruments Methods Phys. Res. Sect. A Accel. Spectrometers, Detect. Assoc. Equip.*, 1021(October 2021), 165927, doi:10.1016/j.nima.2021.165927, 2022.



- Röttger, A., Röttger, S., Grossi, C., Vargas, A., Curcoll, R., Otáhal, P., Hernández-Ceballos, M. Á., Cinelli, G., Chambers, S., Barbosa, S. A., Ioan, M., Radulescu, I., Kikaj, D., Chung, E., Arnold, T., Yver-Kwok, C., Fuente, M., Mertes, F. and Morosh, V.: New metrology for radon at the environmental level, *Meas. Sci. Technol.*, 32(12), 124008, doi:10.1088/1361-6501/ac298d, 2021.
- Röttger, S., Röttger, A., Mertes, F., Morosch, V., Ballé, T. and Chambers, S.: Evolution of traceable radon emanation sources from MBq to few Bq, *Appl. Radiat. Isot.*, 196(February), doi:10.1016/j.apradiso.2023.110726, 2023.
- Schery, S. D. and Huang, S.: An estimate of the global distribution of radon emissions from the ocean, *Geophys. Res. Lett.*, 31(19), 1–4, doi:10.1029/2004GL021051, 2004.
- Schmidt, M., Graul, R., Sartorius, H. and Levin, I.: Carbon dioxide and methane in continental Europe: a climatology, and 222 Radon-based emission estimates, *Tellus B Chem. Phys. Meteorol.*, 48(4), 457–473, doi:10.3402/tellusb.v48i4.15926, 1996.
- Schmithüsen, D., Chambers, S., Fischer, B., Gilge, S., Hatakka, J., Kazan, V., Neubert, R., Paatero, J., Ramonet, M., Schlosser, C., Schmid, S., Vermeulen, A., Levin, I., Attribution, C. C., Schmith, D. and Levin, I.: A European-wide 222radon and 222radon progeny comparison study, *Atmos. Meas. Tech.*, 10(4), 1299–1312, doi:10.5194/amt-10-1299-2017, 2017.
- Szegvary, T., Conen, F. and Ciais, P.: European 222Rn inventory for applied atmospheric studies, *Atmos. Environ.*, 43(8), 1536–1539, doi:10.1016/j.atmosenv.2008.11.025, 2009.
- Tositti, L., Pereira, E. B., Sandrini, S., Capra, D., Tubertini, O. and Bettoli, M. G.: Assessment of Summer Trends of Tropospheric Radon Isotopes in a Coastal Antarctic Station (Terra Nova Bay), *Int. J. Environ. Anal. Chem.*, 82(5), 259–274, doi:10.1080/03067310290027767, 2002.
- Vargas, A., Ortega, X. and Martín Matarranz, J. : Traceability of radon-222 activity concentration in the radon chamber at the technical university of Catalonia (Spain), *Nucl. Instruments Methods Phys. Res. Sect. A Accel. Spectrometers, Detect. Assoc. Equip.*, 526(3), 501–509, doi:10.1016/j.nima.2004.02.022, 2004.
- Vargas, A., Arnold, D., Adame, J. A., Grossi, C., Hernández-Ceballos, M. A. and Bolivar, J. P.: Analysis of the vertical radon structure at the spanish “El arenosillo” tower station, *J. Environ. Radioact.*, 139, 1–17, doi:10.1016/j.jenvrad.2014.09.018, 2015.
- Vogel, F. R., Ishizawa, M., Chan, E., Chan, D., Hammer, S., Levin, I. and Worthy, D. E. J.: Regional non-CO2 greenhouse gas fluxes inferred from atmospheric measurements in Ontario, Canada, *J. Integr. Environ. Sci.*, 9(sup1), 41–55, doi:10.1080/1943815X.2012.691884, 2012.
- Wada, A., Matsueda, H., Murayama, S., Taguchi, S., Hirao, S., Yamazawa, H., Moriizumi, J., Tsuboi, K., Niwa, Y. and Sawa, Y.: Quantification of emission estimates of CO<sub>2</sub>, CH<sub>4</sub> and CO for east asia derived from atmospheric radon-222 measurements over the western North Pacific, *Tellus, Ser. B Chem. Phys. Meteorol.*, 65(1), 1–16, doi:10.3402/tellusb.v65i0.18037, 2013.
- Whittlestone, S. and Zahorowski, W.: Baseline radon detectors for shipboard use: Development and deployment in the First Aerosol Characterization Experiment (ACE 1), *J. Geophys. Res. Atmos.*, 103(D13), 16743–16751, doi:10.1029/98JD00687, 1998.
- Williams, A. G., Chambers, S. D., Conen, F., Reimann, S., Hill, M., Griffiths, A. D. and Crawford, J.: Radon as a tracer of atmospheric influences on traffic-related air pollution in a small inland city, *Tellus, Ser. B Chem. Phys. Meteorol.*, 68(1), doi:10.3402/tellusb.v68.30967, 2016.
- Zahorowski, W., Chambers, S. D. and Henderson-Sellers, A.: Ground based radon-222 observations and their application to atmospheric studies, *J. Environ. Radioact.*, 76(1–2), 3–33, doi:10.1016/j.jenvrad.2004.03.033, 2004.
